# Supplementary material for: Senescence-associated phenotypes in Akita diabetic mice are enhanced by absence of bradykinin B2 receptors
Source: JCI journal article supplement (doi:10.1172/jci26958), 2006-04-07
Supplement: sd1 [file 1]

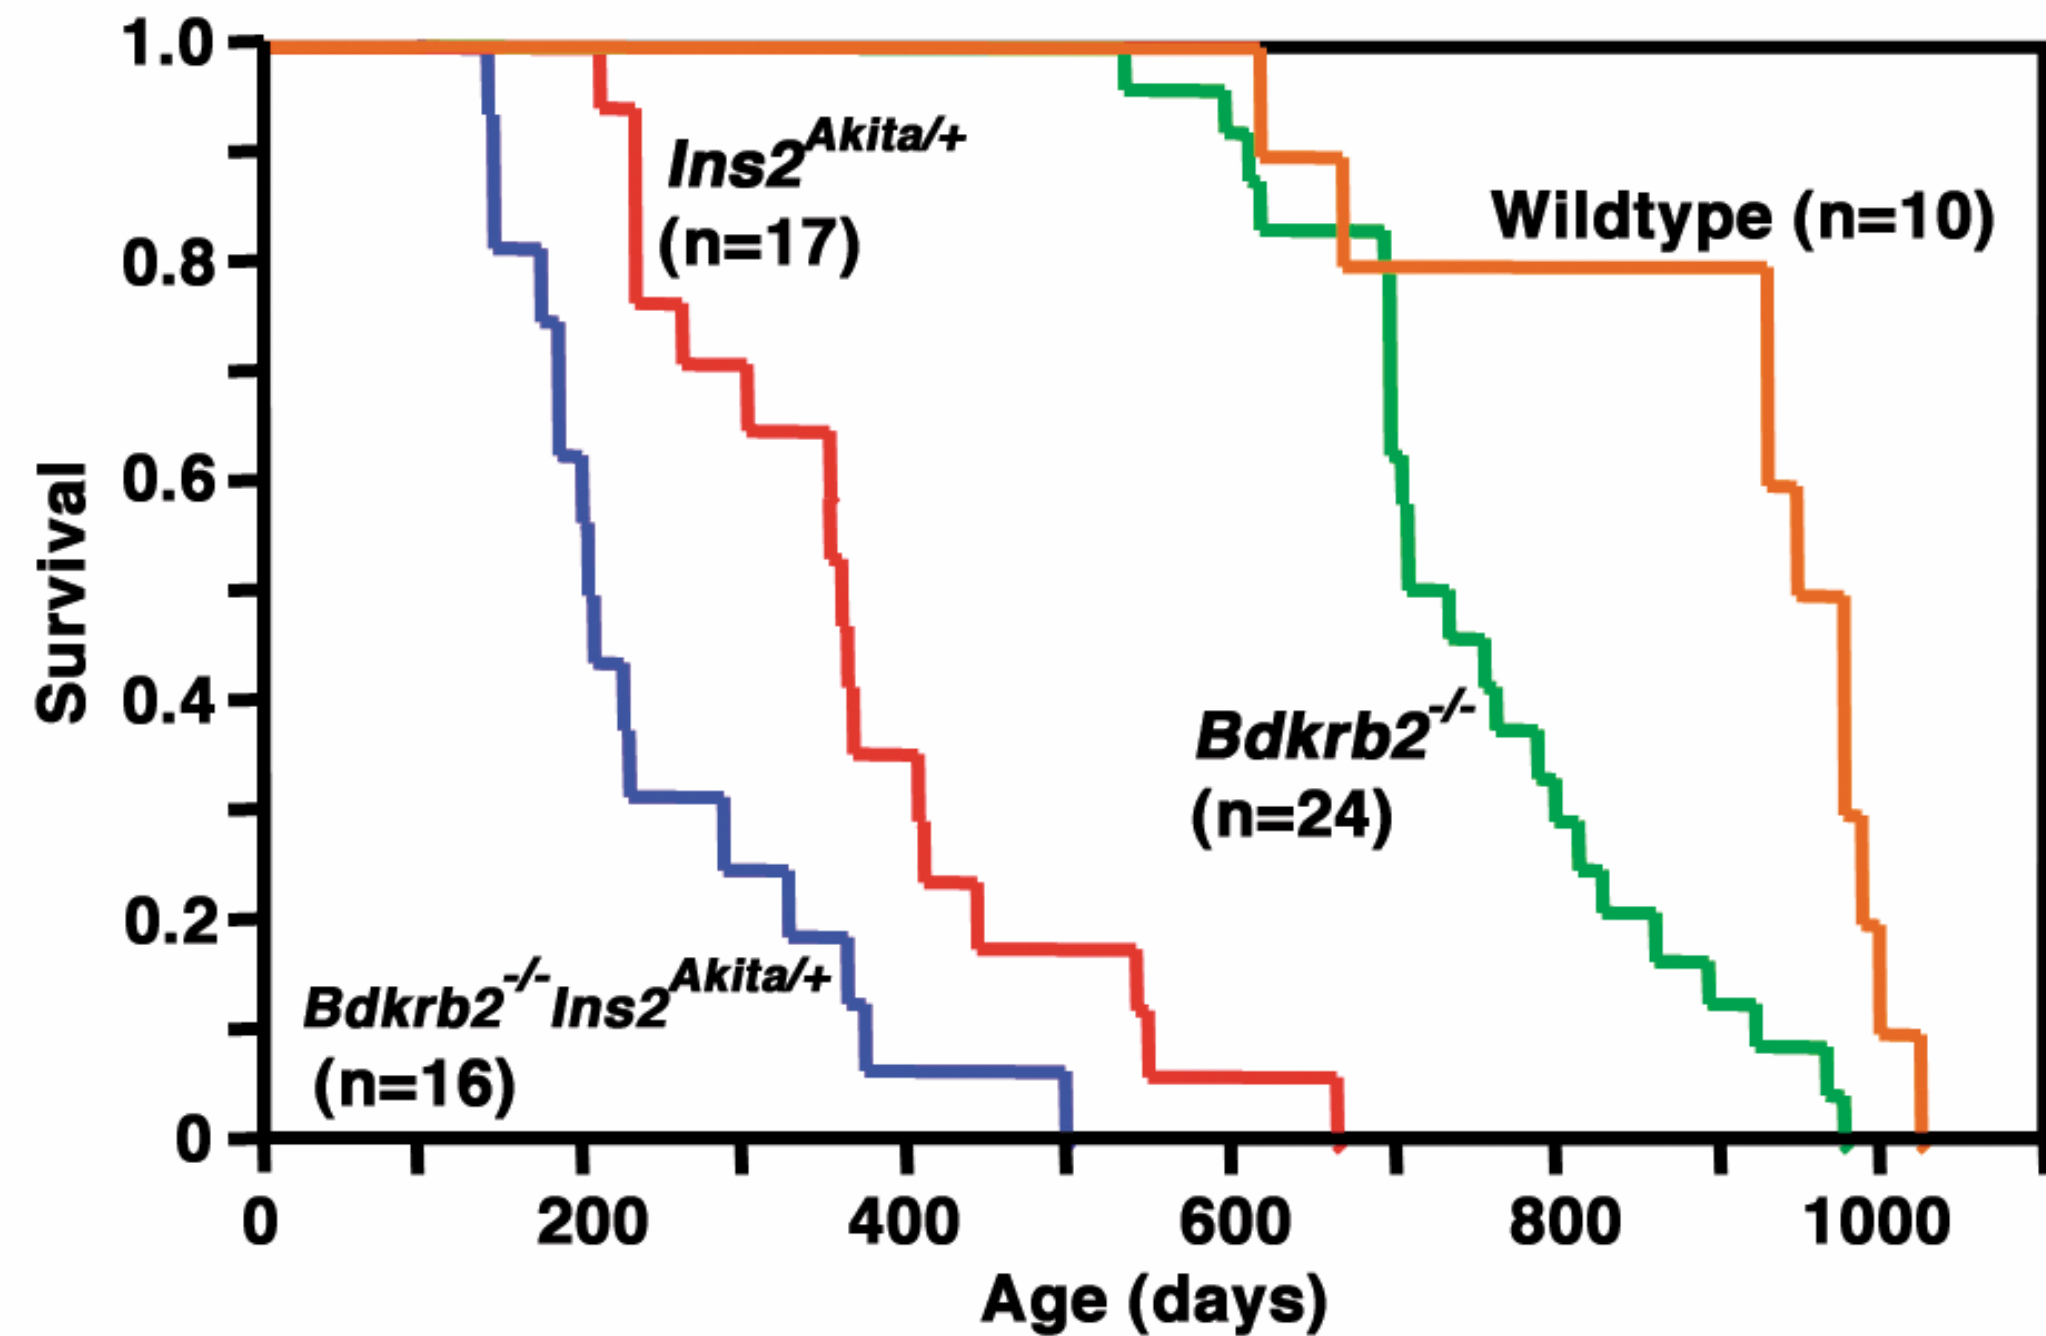

**Wildtype**

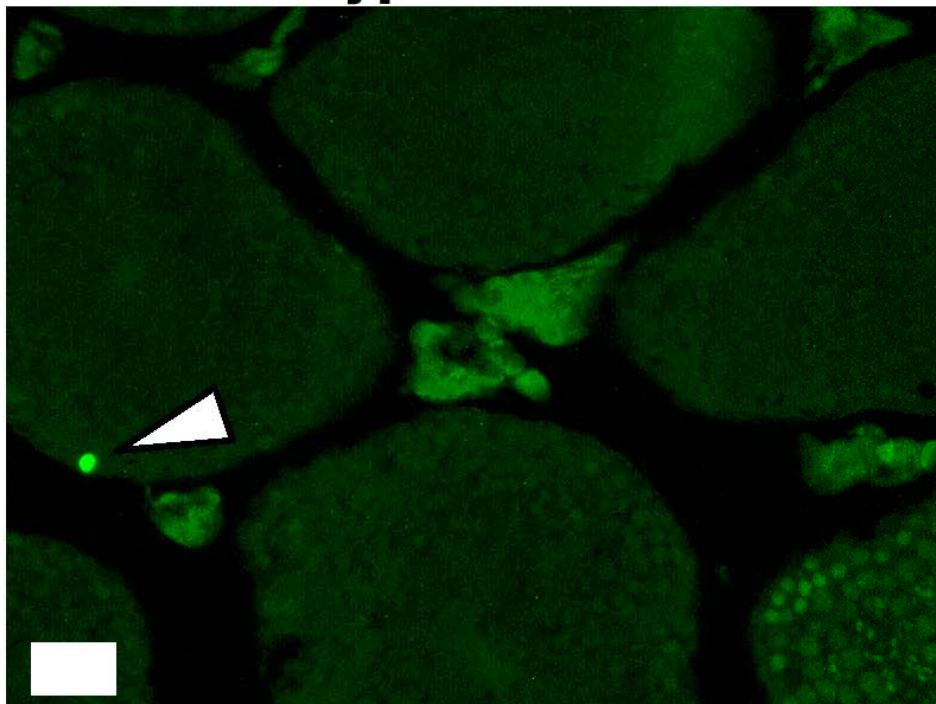

***Bdkrb2*<sup>-/-</sup>**

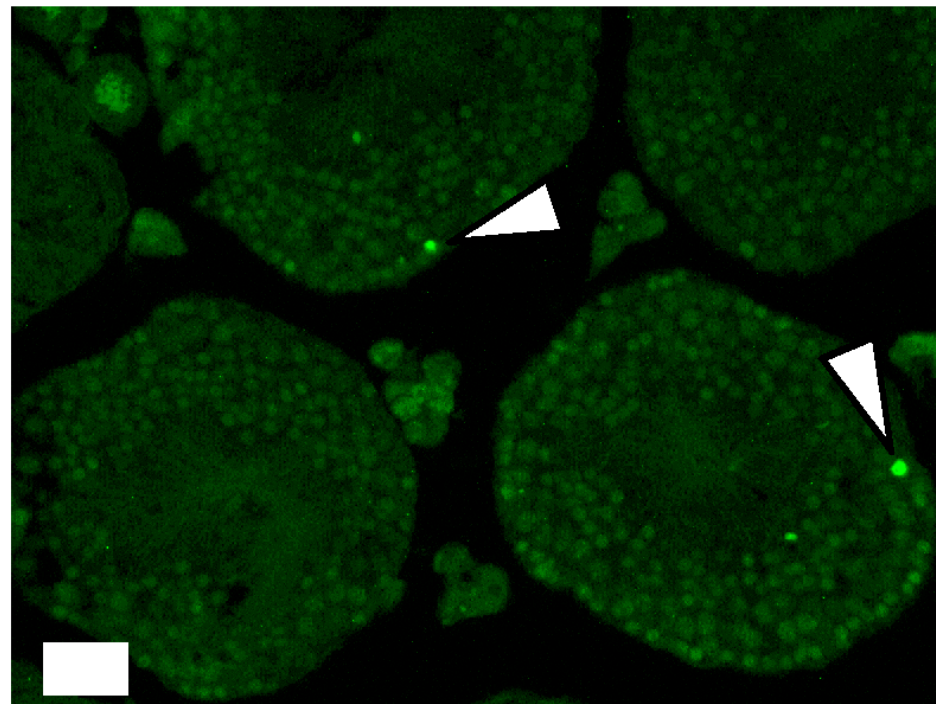

***Ins2*<sup>Akita/+</sup>**

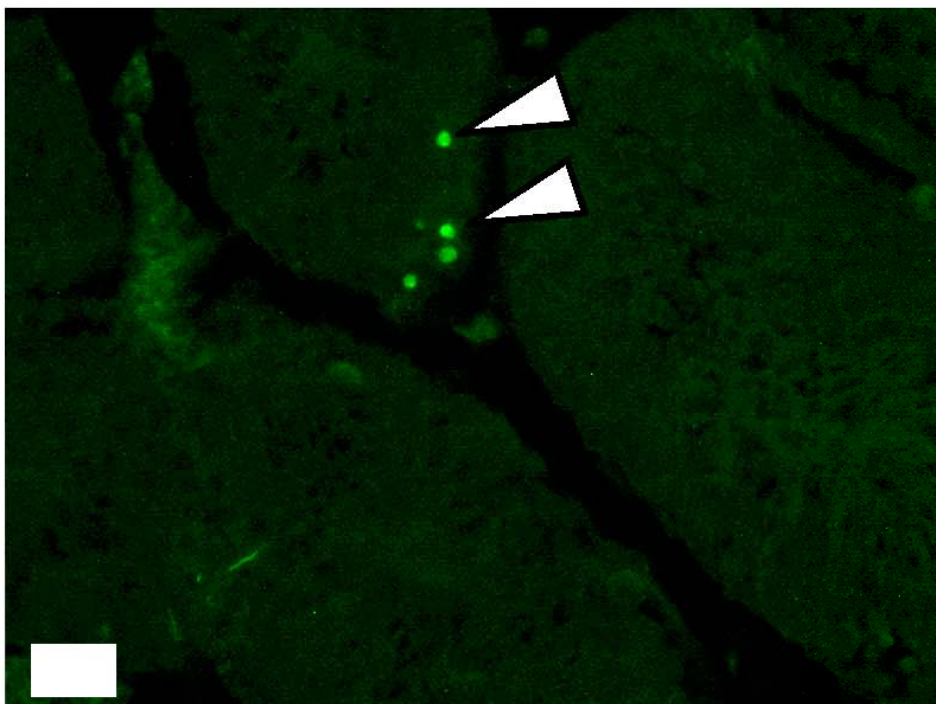

***Bdkrb2*<sup>-/-</sup> *Ins2*<sup>Akita/+</sup>**

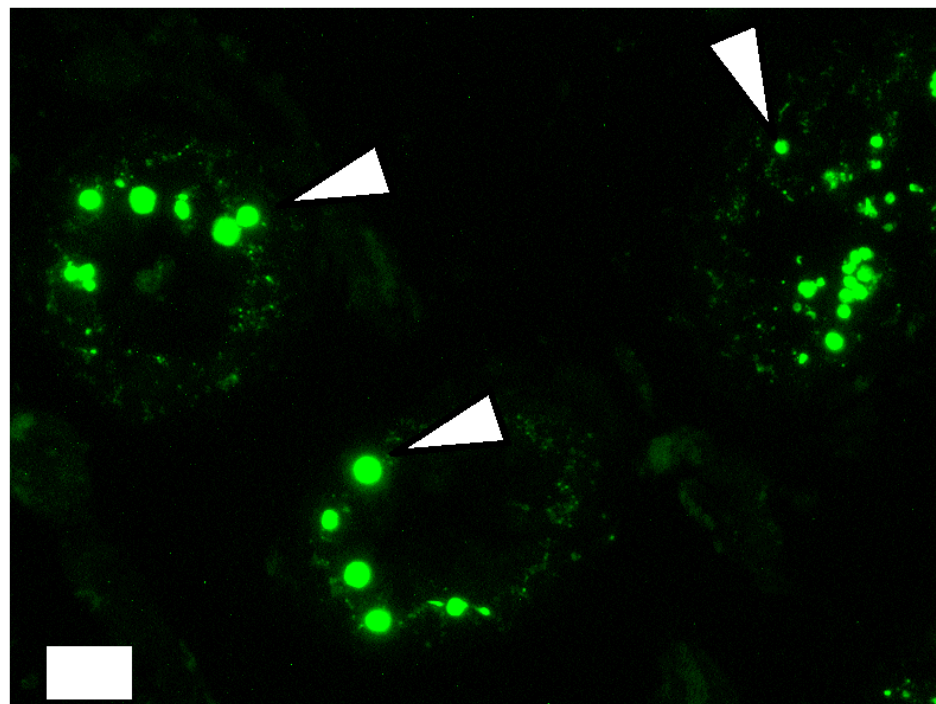

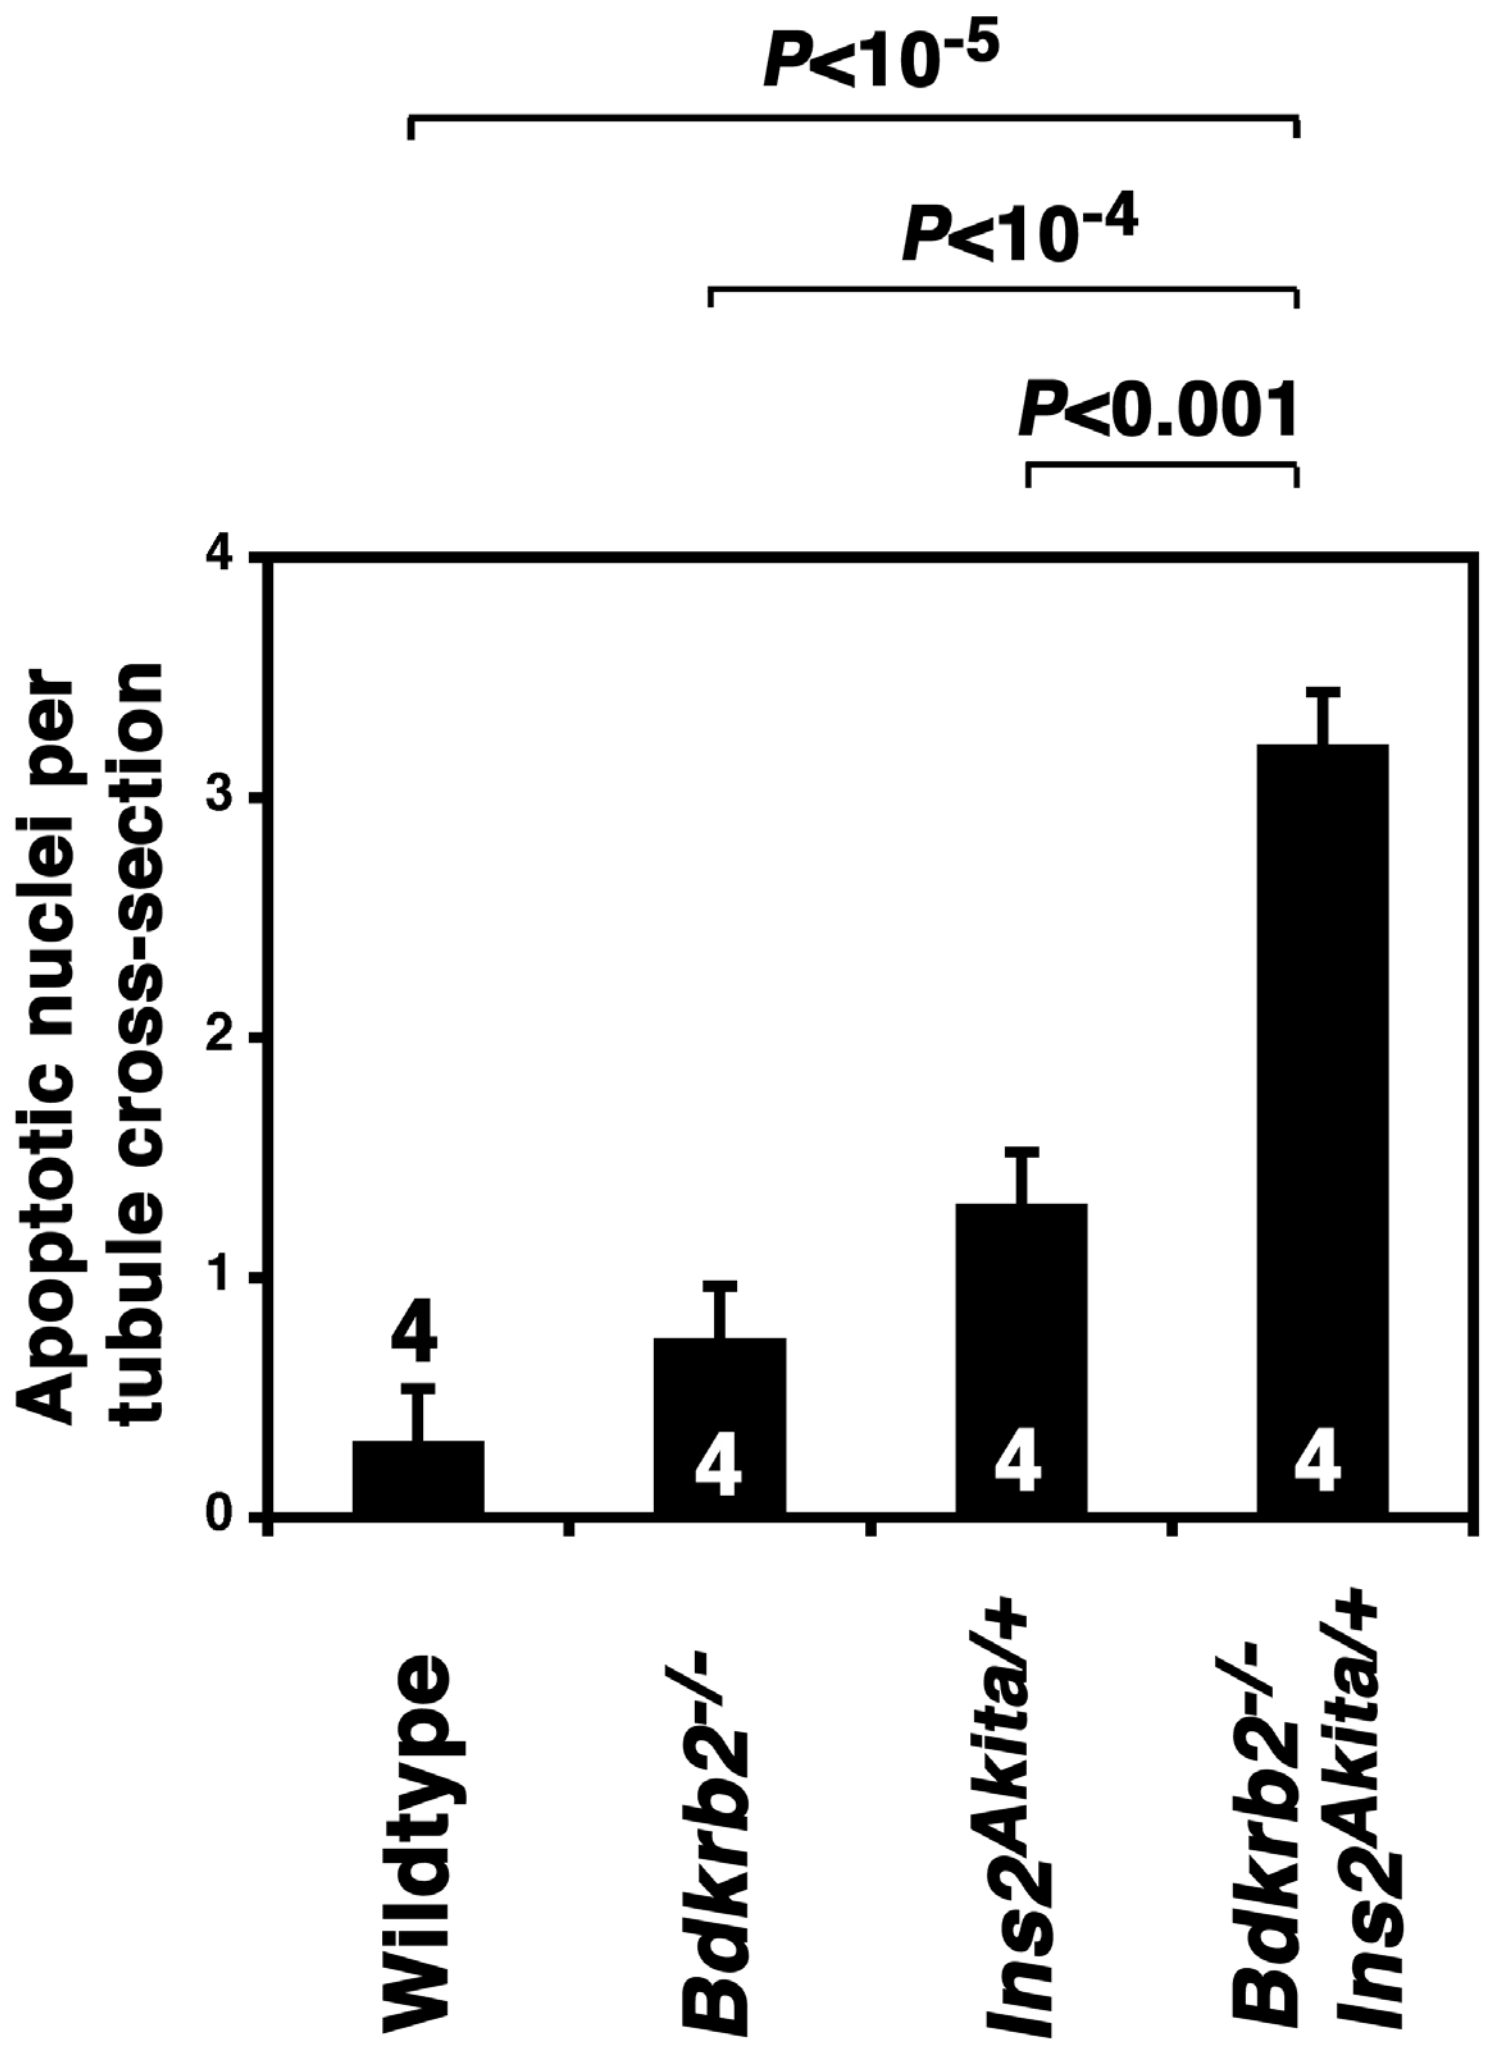

**Wildtype**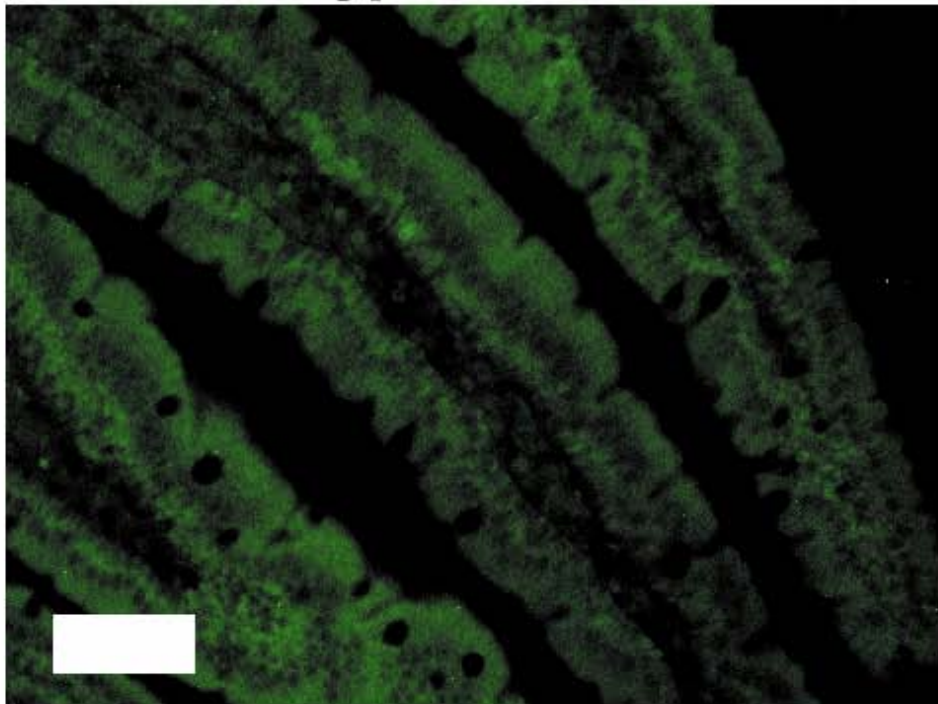***Bdkrb2*<sup>-/-</sup>**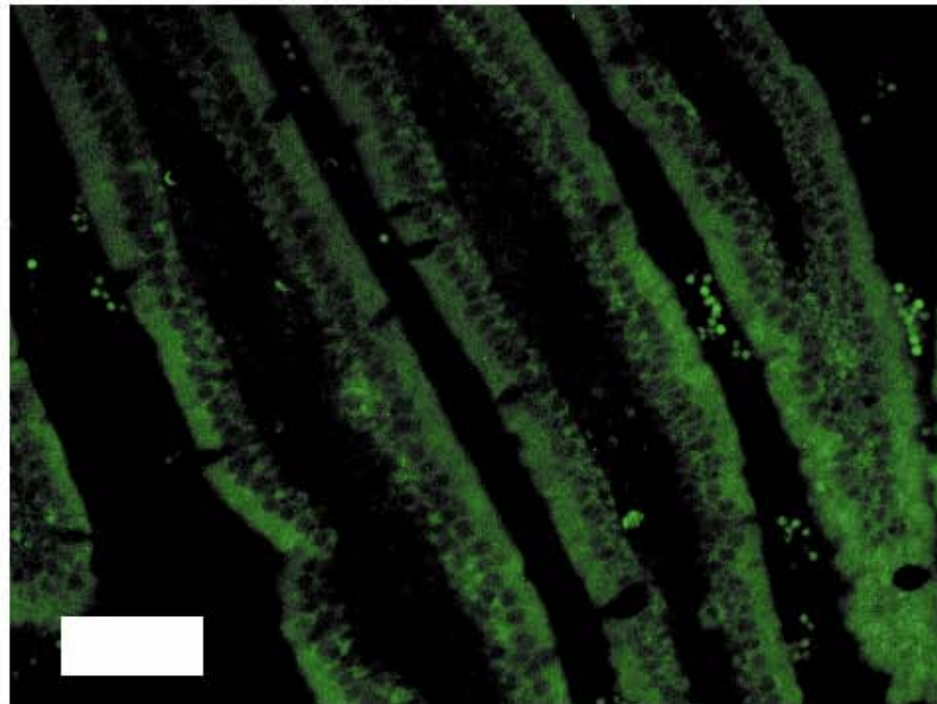***Ins2*<sup>Akita/+</sup>**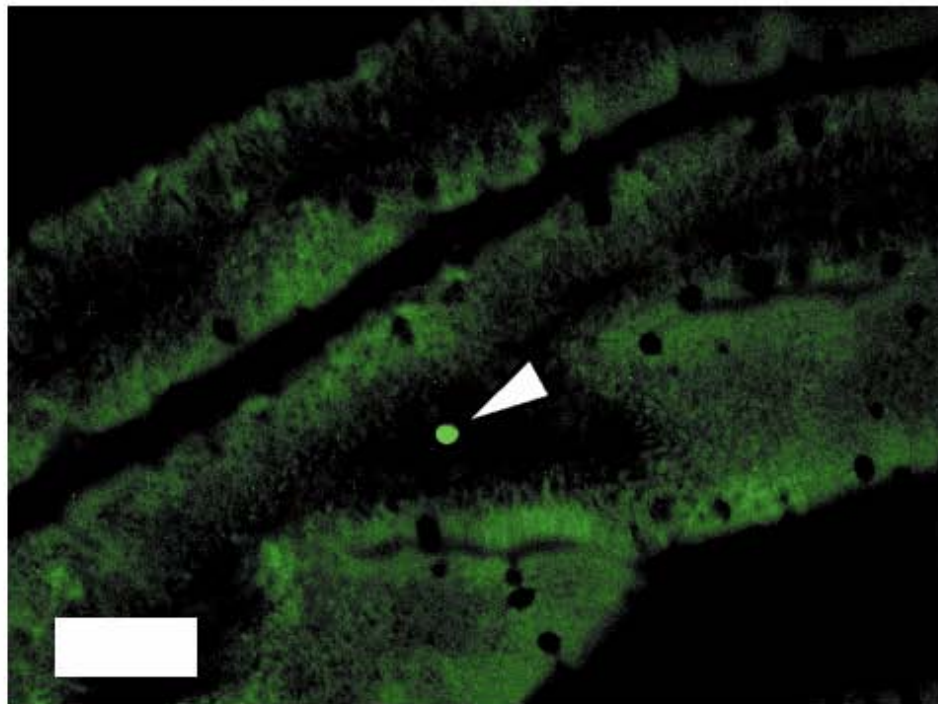***Bdkrb2*<sup>-/-</sup> *Ins2*<sup>Akita/+</sup>**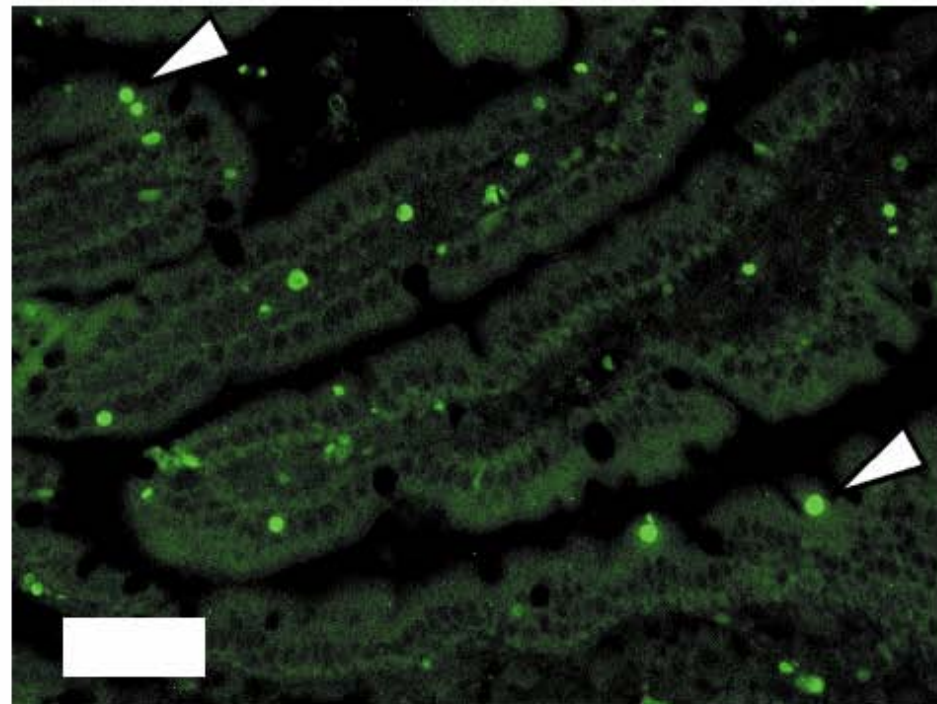

**Apoptotic nuclei / villus**

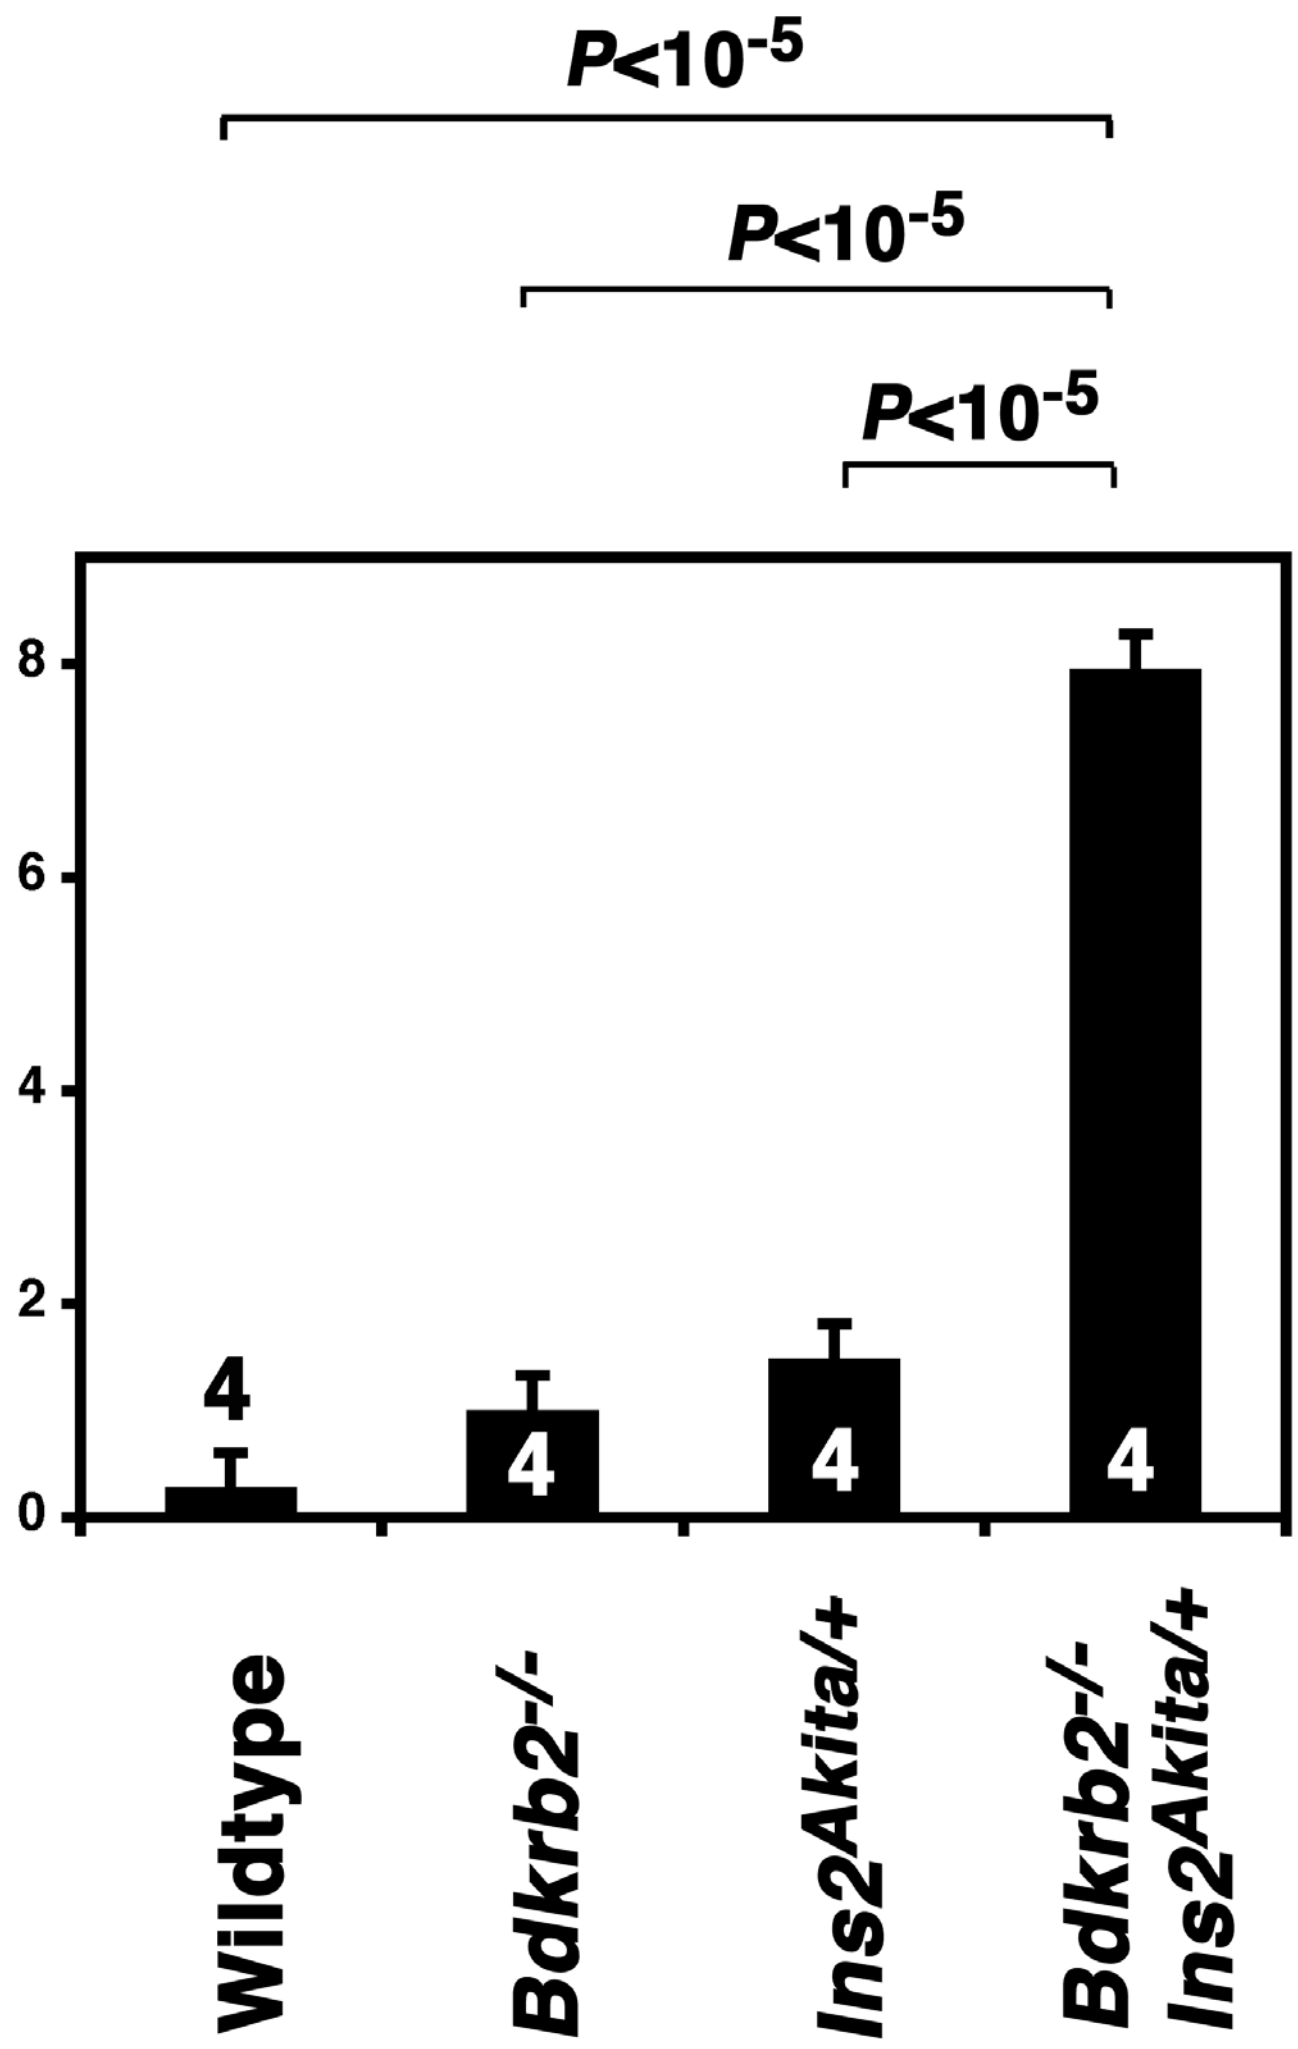

**Wildtype**

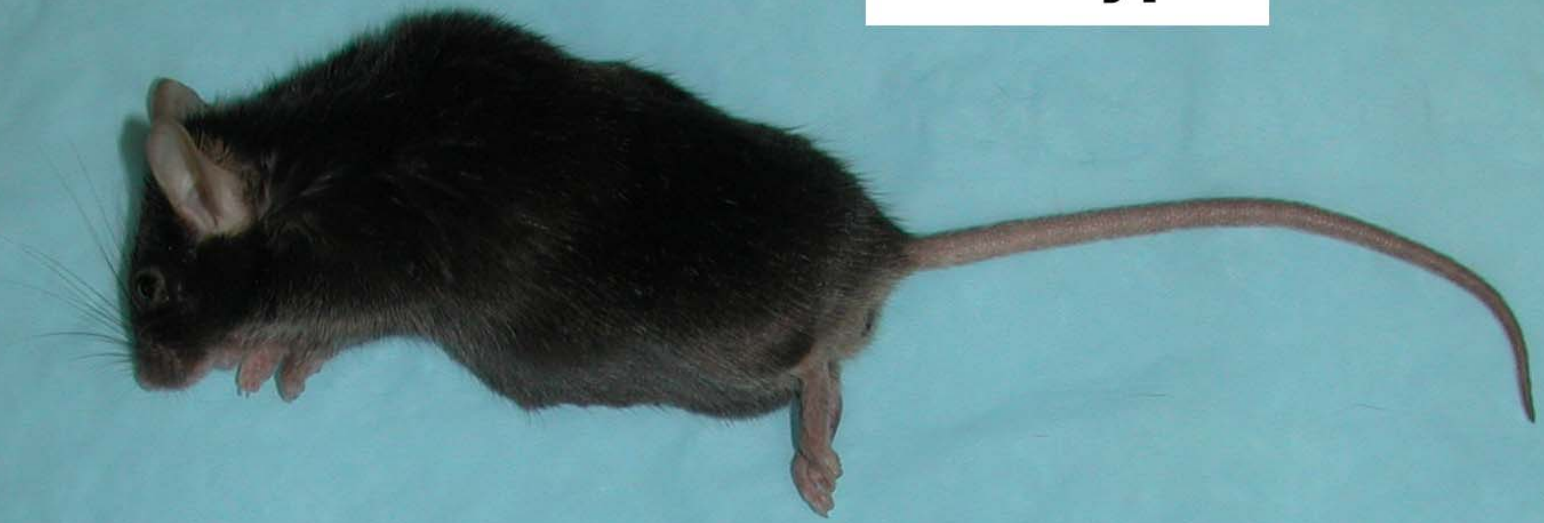

***Bdkrb2*<sup>-/-</sup>**

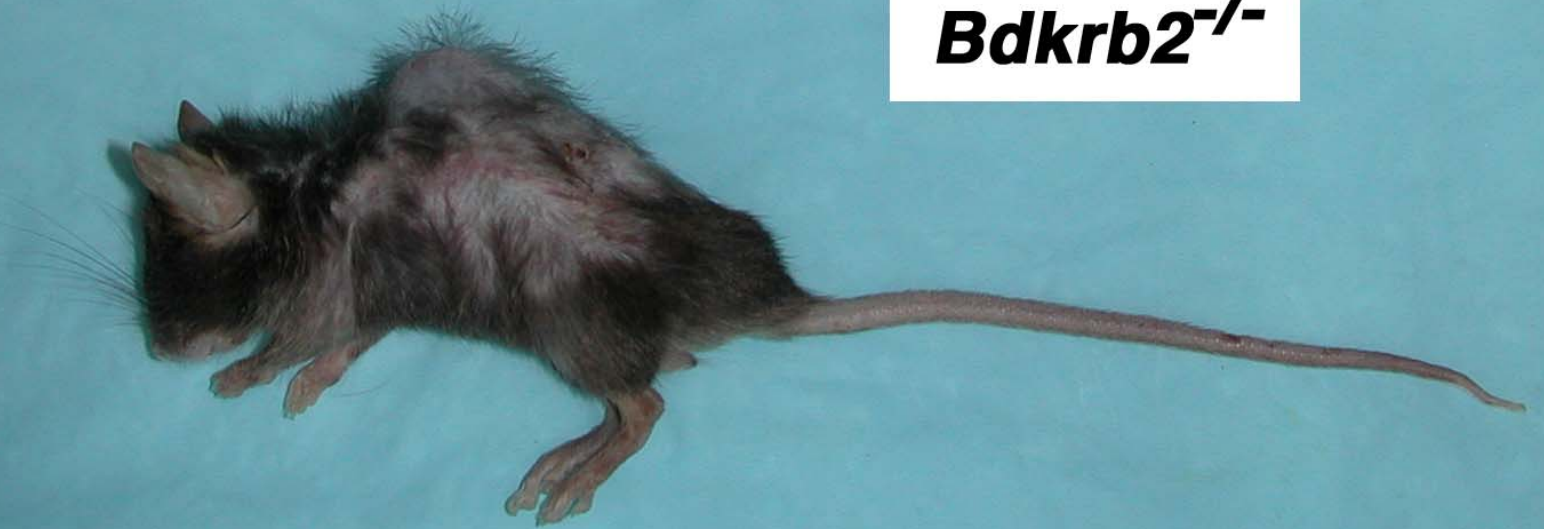

### Supplementary Figure 1

Kaplan-Meier analysis of survival in male mice with the four genotypes.  $P < 0.001$  in *Bdkrb2*<sup>-/-</sup> vs. wildtype,  $P < 0.0001$  in *Ins2*<sup>Akita/+</sup> vs. wildtype and in *Bdkrb2*<sup>-/-</sup> *Ins2*<sup>Akita/+</sup> vs. wildtype,  $P < 0.01$  in *Bdkrb2*<sup>-/-</sup> *Ins2*<sup>Akita/+</sup> vs. *Ins2*<sup>Akita/+</sup> by log-rank test). The average life span of male wildtype, *Bdkrb2*<sup>-/-</sup>, *Ins2*<sup>Akita/+</sup>, and *Bdkrb2*<sup>-/-</sup> *Ins2*<sup>Akita/+</sup> mice was  $909 \pm 45$  days,  $755 \pm 23$  days,  $373 \pm 30$  days, and  $246 \pm 25$  days (means  $\pm$  standard errors), respectively (See Supplementary Table 4 for two-factor ANOVA analysis).

### Supplementary Figure 2

(A) Apoptotic cells (arrowheads) in the seminiferous tubules of 12-month-old mice with the four genotypes (scale bar = 100  $\mu$ m). (B) Quantification of the apoptotic cells in the seminiferous tubule. The data are means  $\pm$  standard errors with the numbers of animals shown in white digits (See Supplementary Table 4 for two-factor ANOVA analysis).

### Supplementary Figure 3

(A) Apoptotic cells (arrowheads) in the duodenum of 12-month-old mice with the four genotypes (scale bar = 100  $\mu$ m). (B) Quantification of the apoptotic cells in the duodenum. The data are means  $\pm$  standard errors with the numbers of animals shown in white digits (See Supplementary Table 4 for two-factor ANOVA analysis).

### Supplementary Figure 4

General appearance of 24-month-old male mice with genotypes: wildtype and

homozygous null for the B2 receptor (*Bdkrb2*<sup>-/-</sup>). Kyphosis is moderate in the wildtype mouse; it is severe in the B2 receptor-null animal, which also exhibits marked alopecia. The animals imaged are among the most severely affected of each genotype. The degree of kyphosis and alopecia in severely affected B2 receptor null mice at 24 months of age is essentially indistinguishable from that in severely affected double mutants (Akita diabetic B2 receptor null) at 12 months of age.

**Supplementary Table 1.** Primers for PCR amplification of mitochondrial cytochrome b gene for detecting point mutations.

(Fwd primer) 5'-CATCGTTGTAATTCAACTACAG-3'

(Rev primer) 5'-CAAGACCAGAGTAATGTTTATAC-3'

**Supplementary Table 2.** Primers and probes for quantification of the proportion of the D-17 mutant in mitochondrial DNA with quantitative PCR.

---

Cytochrome b (Fwd primer) 5'-TCGCTTTCCACTTCATCTTAC-3'

(Rev primer) 5'-ATCCTGTTTCGTGGAGGAAG-3'

(Probe) 5'-FAM-CGCGGCCCTAGCAATCGTTCA-Tamra-3'

D-17 (Fwd primer) 5'-TCATGACCAATGAACACTCTG-3'

(Rev primer) 5'-AGGCTCGCGGACTAGTATAT-3'

(Probe) 5'-FAM-CCCTAGCCCCCAACTAATTACC-Tamra-3'

**Supplementary Table 3.** Primers and probes for quantification of mRNA with quantitative reverse transcription-PCR.

---

|                     |              |                                            |
|---------------------|--------------|--------------------------------------------|
| TGF- $\beta$ 1      | (Fwd primer) | 5'-TGACGTCACTGGAGTTGTACGG-3'               |
|                     | (Rev primer) | 5'-GGTTCATGTCATGGATGGTGC-3'                |
|                     | (Probe)      | 5'-FAM-TTCAGCGCTCACGTCTCTTGTGACAG-Tamra-3' |
| CTGF                | (Fwd primer) | 5'-AGCCGCCTCTGCATGGTCA-3'                  |
|                     | (Rev primer) | 5'-GCGATTTTAGGTGTCCGGAT-3'                 |
|                     | (Probe)      | 5'-FAM-CCTGCGAAGCTGACCTGGAGGAAA-Tamra-3'   |
| p53                 | (Fwd primer) | 5'-TGCTCCGATGGTGATGGCCT-3'                 |
|                     | (Rev primer) | 5'-TGTGGCGAAAAGTCTGCCTG-3'                 |
|                     | (Probe)      | 5'-FAM-CCCCAGCATCTTATCCGGGTGGA-Tamra-3'    |
| $\alpha$ -synuclein | (Fwd primer) | 5'-TACCCACAGGAAGGAATCCT-3'                 |
|                     | (Rev primer) | 5'-CTTGGTAGCCTTCCTCTGAA-3'                 |
|                     | (Probe)      | 5'-FAM-ATGCCTGTGGATCCTGGCAGTGAG-Tamra-3'   |
| FoxO1               | (Fwd primer) | 5'-TGAAGAGCGTGCCCTACTTC-3'                 |
|                     | (Rev primer) | 5'-AGGGACAGATTGTGGCGAAT-3'                 |
|                     | (Probe)      | 5'-FAM-TCCAGCCCGCCGAGCTGTTGCT-Tamra-3'     |
| $\beta$ -actin      | (Fwd primer) | 5'-AAGAGCTATGAGCTGCCTGA-3'                 |
|                     | (Rev primer) | 5'-ACGGATGTCAACGTCACACT-3'                 |
|                     | (Probe)      | 5'-FAM-CACTATTGGCAACGAGCGGTTCCG-Tamra-3'   |

**Supplementary Table 4.** P values for 2-factor ANOVA.

|                                | Diabetes mellitus | Absence of B2 receptors | Interaction |
|--------------------------------|-------------------|-------------------------|-------------|
| TGF- $\beta$ 1 expression      | <0.0001           | 0.0202                  | 0.0575      |
| CTGF expression                | <0.0001           | 0.0588                  | 0.1103      |
| p53 expression                 | <0.0001           | 0.0066                  | 0.4666      |
| $\alpha$ -synuclein expression | <0.0001           | 0.0264                  | 0.2027      |
| FoxO1 expression               | <0.0001           | 0.0119                  | 0.2371      |
| Bone mineral density           | <0.0001           | 0.0030                  | 0.8815      |
| TBARS                          | <0.0001           | <0.0001                 | 0.2133      |
| GSH                            | <0.0001           | 0.0010                  | 0.4407      |
| 8-OHdG                         | <0.0001           | <0.0001                 | 0.0006      |
| Point mutations                | <0.0001           | 0.0227                  | 0.2067      |
| D-17 deletions                 | <0.0001           | <0.0001                 | 0.0534      |
| Lifespan                       | <0.0001           | <0.0001                 | 0.6541      |
| Apoptosis testis               | <0.0001           | 0.0004                  | 0.0090      |
| Apoptosis duodenum             | <0.0001           | <0.0001                 | <0.0001     |
